# Supplementary material for: Plasma treated TiO2/C nanofibers as high performance anode materials for sodium-ion batteries
Source: Royal Society of Chemistry journal article supplement (doi:10.1039/c9ra03224j), 2019-01-01
Supplement: c9ra03224j1.pdf [file c9ra03224j1.pdf]

**Supporting Information:**

**Plasma treated TiO<sub>2</sub>/C nanofibers as high performance anode  
materials for sodium-ion batteries**

Rui Wang\*, Shuimei Chen\*, Daming Ren, Songting Liu, Beibei He, Yansheng  
Gong, and Huanwen Wang

Faculty of Materials Science and Chemistry, China University of Geosciences,  
Wuhan 430074, China

\*Corresponding authors: wangrui@cug.edu.cn; chensm920420@cug.edu.cn

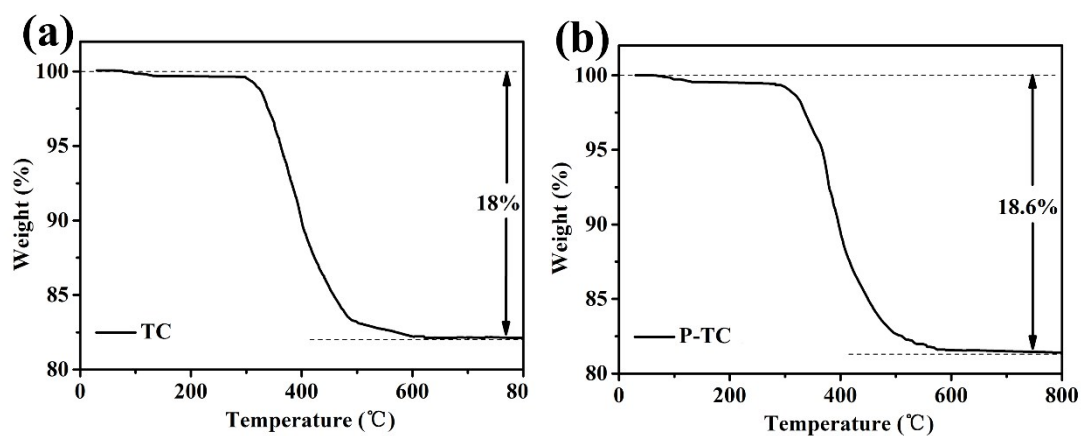

Figure S1 TG results of the TC (a) and P-TCC (b) samples.

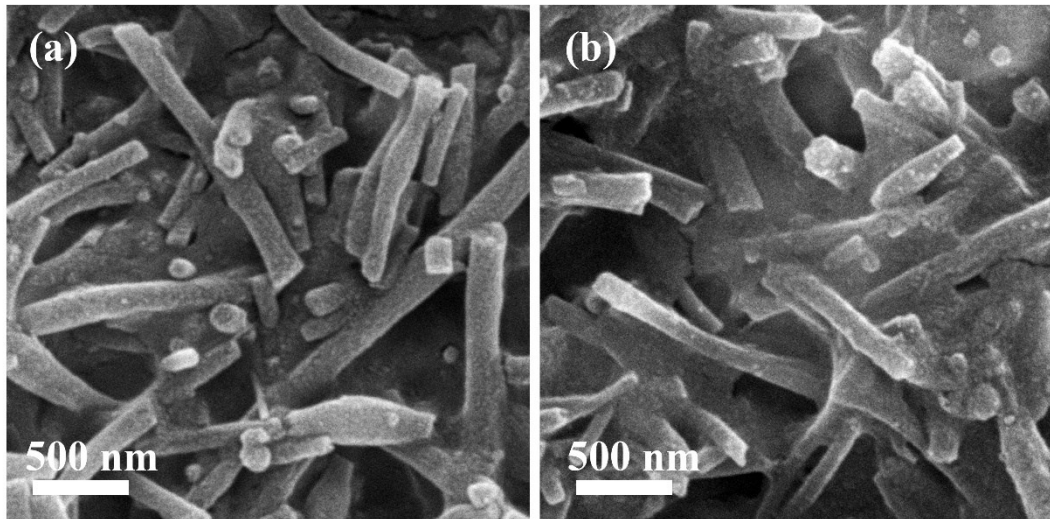

Figure S2 SEM images of P-TCC based electrodes after 3 (a) and 60 (b) cycles.
